# Supplementary material for: A lead-free halide hybrid perovskite (TMHD)BiCl5 for ultraviolet photodetection
Source: Royal Society of Chemistry journal article supplement (doi:10.1039/d2qi01030e), 2022-01-01
Supplement: d2qi01030e1.pdf [file d2qi01030e1.pdf]

## Supporting Information

### A Lead-free Halide Hybrid Perovskite (TMHD)BiCl<sub>5</sub> for the Ultraviolet Photodetection

Wen Weng,<sup>abc</sup> Qin Chen,<sup>b</sup> Yipeng Fan,<sup>b</sup> Zhou Li,<sup>b</sup> Haizhou Huang,<sup>ac</sup> Hongchun Wu,<sup>abc</sup> Chengmin Ji,<sup>\*ab</sup> and Wenxiong Lin<sup>\*ac</sup>

<sup>[a]</sup> State Key Laboratory of Structural Chemistry, Fujian Institute of Research on the Structure of Matter, Chinese Academy of Sciences, Fuzhou, Fujian 350002, P.R. China.

<sup>[b]</sup> University of Chinese Academy of Sciences, Beijing 100049, P.R. China.

<sup>[c]</sup> Fujian Science & Technology Innovation Laboratory for Optoelectronic Information of China, Fuzhou, 350108, P.R. China

### Experimental Section

**Synthesis.** All the chemical reagents were purchased as high purity (AR grade) and used without any further purification. The compound of (TMHD)BiCl<sub>5</sub> has been synthesized in aqueous solution of Bi<sub>2</sub>O<sub>3</sub> and TMHD in a ratio of 2:1 in concentrated HCl.

**Single-crystal structure determination.** Single-crystal X-ray diffractions for **1** were performed on a Bruker 8 diffractometer with the Mo K $\alpha$  radiation at 300K. The data were processed by the Crystalclear software package. The structures of **1** were solved by direct methods and then refined by the full-matrix least-squares refinements on  $F^2$  using SHELXLTL software package. Crystallographic data and structure refinements for **1** at different temperatures are given in Table S1.

**The optical ultraviolet-visible absorption spectrum measurements.** The UV absorptions in solid state were measured at room temperature on a PE Lambda 900 UV-Visible spectrophotometer.

**Computational description.** Single-crystal structure data of **1** at 300 K was used for the theoretical calculations. Band structure and partial density of states (PDOS) were performed by the DFT method within the total-energy code CASTEP. The exchange and correlation effects were treated by Perdew-Burke-Ernzerh in the generalized gradient approximation. The core-electrons interactions between the ionic cores and the electrons were described by the norm-conserving pseudo potential.

**Fabrication and Measurements of Detectors:** The surface of crystal **1** was cleaned with nitrogen flow before device fabrication. The vertical-type detectors were fabricated based on single crystals of **1**, with an electrode length of about 1 mm and gold electrode spacing of about 300  $\mu$ m. The photoresponse experiments were performed by using a Keithley 6517B source meter at room temperature under 266 nm illumination.

## Figures

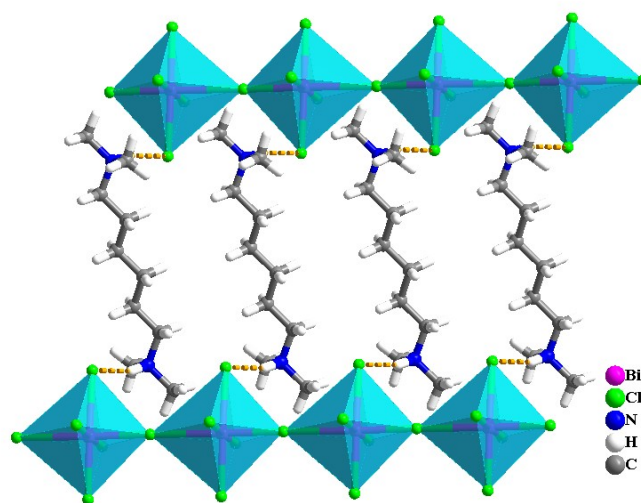

Figure S1. N-H...Cl hydrogen bonds generated from the N atom of organic cation and Cl atom of inorganic skeleton.

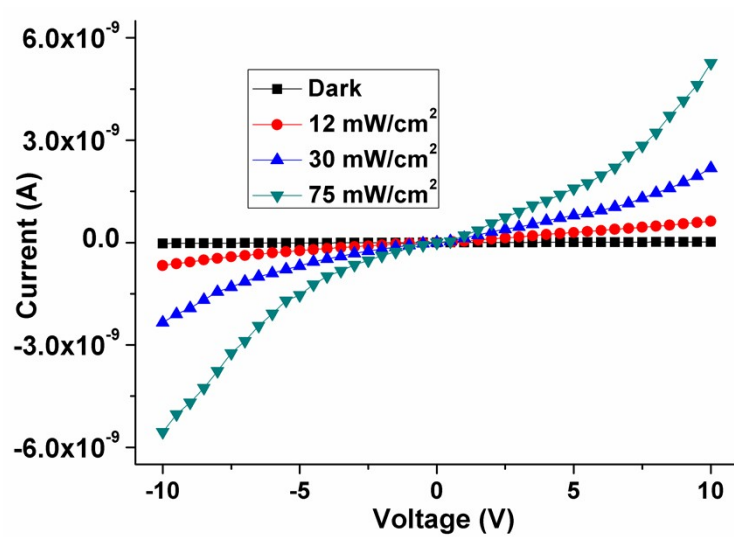

Figure S2. I-V curves of (TMHD)BiCl<sub>5</sub> under 405 nm light illumination with different power density.

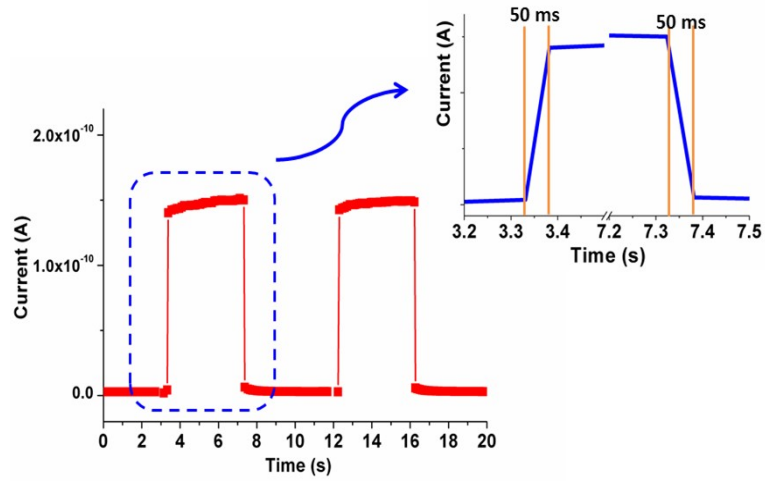

Figure S3. I-t curves of (TMHD)BiCl<sub>5</sub> and the photoresponse time.

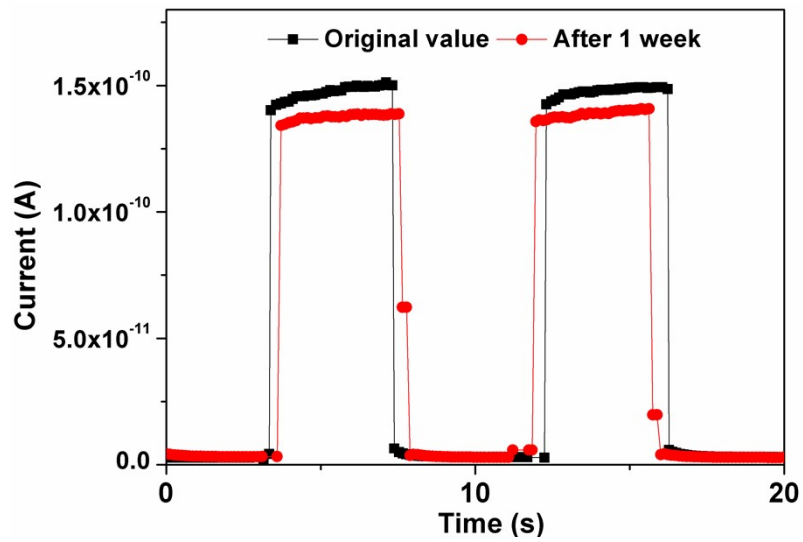

Figure S4. Variation in the photocurrent of (TMHD)BiCl<sub>5</sub> with exposure time in air. After exposure to the air for 1 week, the photocurrent of the device maintained > 95.0% of its initial state.

## Tables

**Table S1.** Crystal Data and Structure Refinement

|                                             |                                                                                |
|---------------------------------------------|--------------------------------------------------------------------------------|
| Empirical formula                           | C <sub>10</sub> H <sub>26</sub> Bi <sub>7</sub> Cl <sub>5</sub> N <sub>2</sub> |
| Formula weight                              | 560.56                                                                         |
| Temperature/K                               | 173(2)                                                                         |
| Space group                                 | P2 <sub>1</sub> /c                                                             |
| a/Å                                         | 5.565000(10)                                                                   |
| b/Å                                         | 18.5529(5)                                                                     |
| c/Å                                         | 18.7630(5)                                                                     |
| α/°                                         | 90.00                                                                          |
| β/°                                         | 97.124(2)                                                                      |
| γ/°                                         | 90.00                                                                          |
| Volume/ Å <sup>3</sup>                      | 1922.27(8)                                                                     |
| Z                                           | 4                                                                              |
| ρ <sub>calc</sub> /cm <sup>3</sup>          | 1.937                                                                          |
| μ/mm <sup>-1</sup>                          | 9.855                                                                          |
| F(000)                                      | 1072.0                                                                         |
| Radiation                                   | MoKα (λ = 0.71073)                                                             |
| 2θ range for data collection/°              | 6.92 to 52.74                                                                  |
| Index ranges                                | -6 ≤ h ≤ 6, -20 ≤ k ≤ 23, -22 ≤ l ≤ 23                                         |
| Reflections collected                       | 11859                                                                          |
| Independent reflections                     | 3903 [R <sub>int</sub> = 0.0394, R <sub>sigma</sub> = N/A]                     |
| Data/restraints/parameters                  | 3903/0/167                                                                     |
| Goodness-of-fit on F <sup>2</sup>           | 1.131                                                                          |
| Final R indexes [I >= 2σ (I)]               | R <sub>1</sub> = 0.0381, wR <sub>2</sub> = 0.0928                              |
| Largest diff. peak/hole / e Å <sup>-3</sup> | 1.16/-3.54                                                                     |

**Table S2.** The bond lengths

| Bond                       | (Å)        | Bond                       | (Å)       |
|----------------------------|------------|----------------------------|-----------|
| Bi(1) - Cl(5)              | 2.5466(18) | C(8) - C(9)                | 1.512(9)  |
| Bi(1) - Cl(3)              | 2.5973(16) | C(9) - C(10)               | 1.511(10) |
| Bi(1) - Cl(2)              | 2.6052(17) | C(10) - C(10) <sup>3</sup> | 1.507(13) |
| Bi(1) - Cl(4)              | 2.7614(16) | N(1) - C(1)                | 1.475(9)  |
| Bi(1) - Cl(1)              | 2.8061(16) | N(1) - C(2)                | 1.485(9)  |
| Bi(1) - Cl(5) <sup>1</sup> | 3.0191(18) | N(1) - C(3)                | 1.501(8)  |
| Cl(5) - Bi(1) <sup>2</sup> | 3.0191(18) | C(4) - C(3)                | 1.501(10) |
| N(2) - C(7)                | 1.478(8)   | C(4) - C(5)                | 1.543(10) |
| N(2) - C(6)                | 1.492(8)   | C(5) - C(5) <sup>4</sup>   | 1.481(14) |
| N(2) - C(8)                | 1.495(8)   |                            |           |

<sup>1</sup>-1+X,+Y,+Z; <sup>2</sup>1+X,+Y,+Z; <sup>3</sup>1-X,1-Y,1-Z; <sup>4</sup>-1-X,1-Y,-Z

**Table S3.** The bond angles

| Bond                  | Angle/°   | Bond                               | Angle/°   |
|-----------------------|-----------|------------------------------------|-----------|
| Cl(5) - Bi(1) - Cl(3) | 90.45(6)  | Cl(2) - Bi(1) - Cl(1)              | 88.19(5)  |
| Cl(5) - Bi(1) - Cl(2) | 91.60(6)  | Cl(4) - Bi(1) - Cl(1)              | 87.33(5)  |
| Cl(3) - Bi(1) - Cl(2) | 93.83(6)  | Cl(5) - Bi(1) - Cl(5) <sup>1</sup> | 178.21(9) |
| Cl(5) - Bi(1) - Cl(4) | 87.79(6)  | Cl(3) - Bi(1) - Cl(5) <sup>1</sup> | 87.89(5)  |
| Cl(3) - Bi(1) - Cl(4) | 90.67(5)  | Cl(2) - Bi(1) - Cl(5) <sup>1</sup> | 89.18(6)  |
| Cl(2) - Bi(1) - Cl(4) | 175.47(5) | Cl(4) - Bi(1) - Cl(5) <sup>1</sup> | 91.56(5)  |
| Cl(5) - Bi(1) - Cl(1) | 90.54(5)  | Cl(1) - Bi(1) - Cl(5) <sup>1</sup> | 91.09(5)  |
| Cl(3) - Bi(1) - Cl(1) | 177.73(5) | Bi(1) - Cl(5) - Bi(1) <sup>2</sup> | 178.21(9) |

<sup>1</sup>-1+X,+Y,+Z; <sup>2</sup>1+X,+Y,+Z; <sup>3</sup>1-X,1-Y,1-Z; <sup>4</sup>-1-X,1-Y,-Z
